# Supplementary material for: Self-assembly of uniform hexagonal yttrium phosphate nanocrystals
Source: Royal Society of Chemistry journal article supplement (doi:10.1039/b606531g), 2006-01-01

## Electronic Supplementary Information

### Experimental Methods:

All chemicals were of analytical grade and were used as received without further treatment. Deionized water was used throughout.

- 5 In a typical synthesis of hexagonal  $\text{YPO}_4 \cdot 0.8\text{H}_2\text{O}$  NCs, 1.2g NaOH was added to the mixture of 20ml oleic acid (OA) and 20ml ethanol and stirring for a while. 0.2M  $\text{NaH}_2\text{PO}_4$  solution (5ml) and 0.2M  $\text{Y}(\text{NO}_3)_3$  (5ml) solution were added to the mixture solvent, the white precipitate of amorphous  $\text{YPO}_4$  appeared immediately. After stirring for about 0.5 hour, the mixture was transferred into a 50ml autoclave, which filled with ethanol, sealed and heated at ca. 100-140°C for 12 – 8 hours. The system was then allowed to cool to room temperature. The final white products spontaneously separate in bottom of the autoclave. Doped samples were prepared as above, except that additional 10% (total molar
- 10 ratio)  $\text{Eu}(\text{NO}_3)_3$  was added into the system and doped samples exhibit orange-red luminescence..

The products were characterized by a Bruker D8 Advance X-ray diffractometer (XRD) with  $\text{Cu K}\alpha$  radiation ( $\lambda=1.5418\text{\AA}$ ). The operation voltage and current were kept at 40KV and 40mA, respectively. The size and morphology of the nanocrystals were examined with a JEOL JEM-1200EX transmission electron microscope (TEM) and a Tecnai F20 high-resolution transmission electron microscope (HRTEM). SAED patterns were recorded by transmission electron microscopy. Raman (Renishaw RM 1000 Raman spectrometer, excitation

15 wavelength 633nm) and Fourier transform infrared spectra (Perkin-Elmer Spectrum GX) were used to characterize the structure of the samples. Electron energy loss spectra (EELS) measurement was performed with a Gatan parallel detection spectrometer attached to a JEOL JEM-2010F transmission electron microscope. Fluorescent spectra were recorded with a Hitachi F-4500 Fluorescence Spectrophotometer.

**SFigure 1** XRD pattern of Yttrium Phosphate hydrate NCs.

20

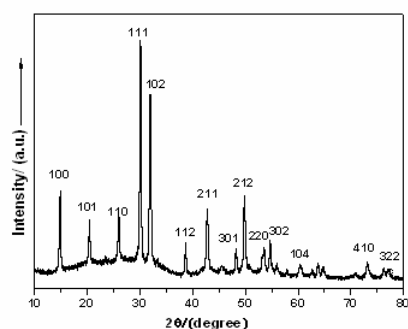

**SFigure 2** EDXA spectrum of products.

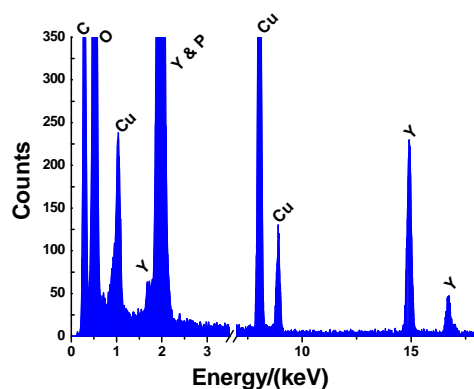

25

**SFigure 3:** a) FTIR spectrum of H-NCs. The vibration band at  $1704$  and  $1610\text{cm}^{-1}$  is attributed to C=O and C=C vibrations respectively.

Two characteristic bands appear at  $1546$  and  $1456\text{cm}^{-1}$  corresponding to the antisymmetric vs (COO<sup>-</sup>), and the symmetric vs (COO<sup>-</sup>), stretches respectively. The O-H stretching vibrations broad bands centered at  $3510\text{cm}^{-1}$ , and  $2927\text{cm}^{-1}$ ,  $2856\text{cm}^{-1}$  are assigned to the antisymmetric and symmetric methylene stretches (vas (CH<sub>2</sub>), vs (CH<sub>2</sub>)) of the oleic acid molecule which implied the existence of large amounts of alkyl chain. The broad band centered at  $1078\text{cm}^{-1}$  and  $1012\text{cm}^{-1}$ , as well as  $630\text{cm}^{-1}$  and  $540\text{cm}^{-1}$ , come from hexagonal YPO<sub>4</sub> · 0.8H<sub>2</sub>O, b) Raman spectrum of H-NCs. The bands center at  $1440\text{cm}^{-1}$  and  $1660\text{cm}^{-1}$  are attributed to COO<sup>-</sup> and C=O vibrations respectively, and the others are due to alkyl chain vibrations, c-d) EELS by core-level excitations: EELS spectra at C-K edge (c) and O-K edge (d). The observed initial peak in the carbon K-edge spectrum located around  $284.5\text{eV}$  is attributed to  $1s \rightarrow \pi^*$  transitions suggested C atoms in the uncrystallized overlayer are  $sp^2$  hybridized in agreement with the existence of C=C in OA molecules. The energy loss starting at  $291\text{eV}$  revealed C atoms  $1s \rightarrow \sigma^*$  transitions. The peak at  $532\text{eV}$  in O-K edge spectrum is attributed to O atoms  $1s \rightarrow \sigma^*$  transitions mainly coming from carboxyl of OA.

30

35

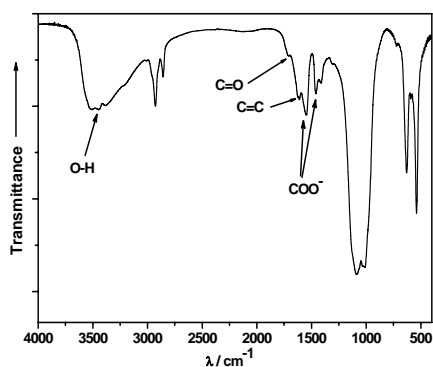

**SFigure 3a**

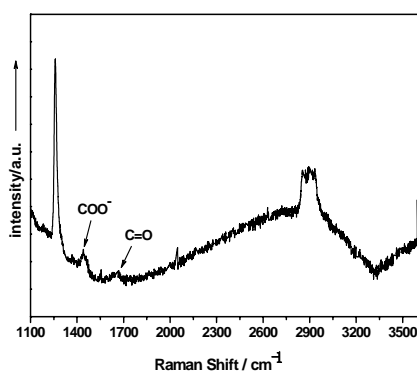

**SFigure 3b**

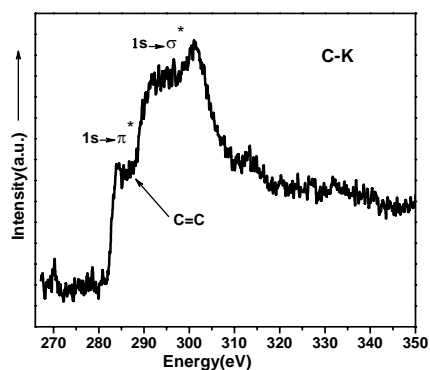

**SFigure 3c**

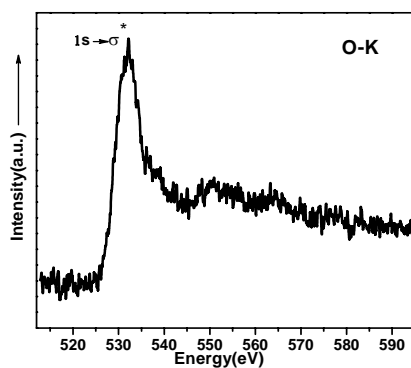

**SFigure 3d**

40 **Figure 4** Re-dispersibility of H- Yttrium Phosphate hydrate NCs: a) As-obtained H- NCs completely dispersed in hexane. (The system can be stable for several days) b) NCs were precipitated after adding alcohol into the system c) NCs were precipitated in the bottom and the solvent become transparent and almost colorless. d) NCs deposition was separated from the system and re-dispersed into hexane

45

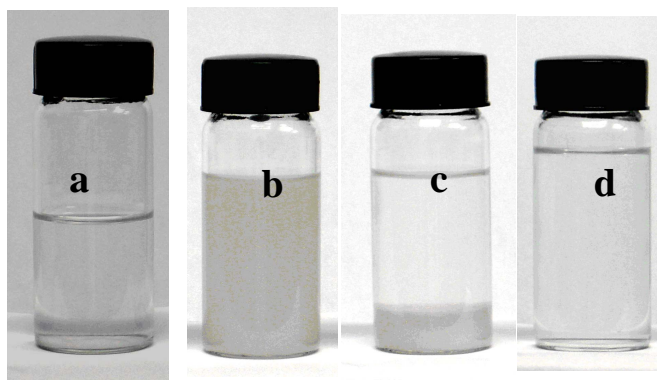

Supplement: b606531g.pdf [file b606531g.pdf]
